# Supplementary material for: Psychosocial Factors Associated With Irritable Bowel Syndrome Development in Chinese College Freshmen
Source: PubMed Central journal article supplement — J Neurogastroenterol Motil. 2019 Apr 30;25(2):233–40. doi: 10.5056/jnm18028 (PMC6474708; doi:10.5056/jnm18028), 2019-04-30
Supplement: JNM-25-233_suppl.pdf [file JNM-25-233_suppl.pdf]

**Supplementary Table.** General Characteristics of Participants

| Characteristics          | Participants (n = 2053) |
|--------------------------|-------------------------|
| Sex                      |                         |
| Females                  | 731 (35.6)              |
| Males                    | 1322 (64.4)             |
| Age (yr)                 | 18.17 ± 0.92            |
| BMI (kg/m <sup>2</sup> ) | 21.03 ± 3.11            |
| Education                |                         |
| Engineering              | 1320 (64.3)             |
| Liberal arts             | 154 (7.5)               |
| Medicine                 | 579 (28.2)              |
| Residence                |                         |
| City                     | 954 (46.4)              |
| Rural area               | 646 (31.5)              |
| Town                     | 453 (22.1)              |
| Only child               |                         |
| Yes                      | 1216 (59.3)             |
| No                       | 837 (40.7)              |
| Single parent            |                         |
| No                       | 1932 (94.1)             |
| Yes                      | 121 (5.9)               |
| Anxiety                  |                         |
| No                       | 1998 (97.3)             |
| Yes                      | 55 (2.7)                |
| Depression               |                         |
| No                       | 1968 (95.8)             |
| Yes                      | 85 (4.2)                |
| Experience of abuse      |                         |
| No                       | 2016 (98.2)             |
| Yes                      | 37 (1.8)                |
| Suicidal intention       |                         |
| No                       | 1989 (96.8)             |
| Yes                      | 64 (3.2)                |

BMI, body mass index.

Values were expressed as n (%) or mean ± standard deviation.
